# Supplementary material for: Production of Fatty Acids and Protein by Nannochloropsis in Flat-Plate Photobioreactors
Source: PLoS One. 2017 Jan 19;12(1):e0170440. doi: 10.1371/journal.pone.0170440 (PMC5245880; doi:10.1371/journal.pone.0170440)
Supplement: S2 Table — The Run is the time at which the pair of photobioreactors were used for cultivation, Reactor identifies each of the individual photobioreactors, Treatment defines the high-NP or low-NP treatment, Cultivation time describes the period of cultivation and Replicate indicates each of the three replicate cultivations for any given treatment/ cultivation time combination. (XLS) [file pone.0170440.s008.xls]

## Sheet: Sheet1
Run	Reactor	Treatment	Cultivation time	Replicate
1	A	low-NP	16	1
1	B	high-NP	16	1
2	A	high-NP	8	1
2	B	low-NP	8	1
3	A	low-NP	12	1
3	B	high-NP	12	1
4	A	high-NP	16	2
4	B	low-NP	16	2
5	A	low-NP	8	2
5	B	high-NP	8	2
6	A	high-NP	12	2
6	B	low-NP	12	2
7	A	low-NP	16	3
7	B	high-NP	16	3
8	A	high-NP	8	3
8	B	low-NP	8	3
9	A	low-NP	12	3
9	B	high-NP	12	3
